# Supplementary material
Source: PubMed Central journal article supplement (PMC3006268)

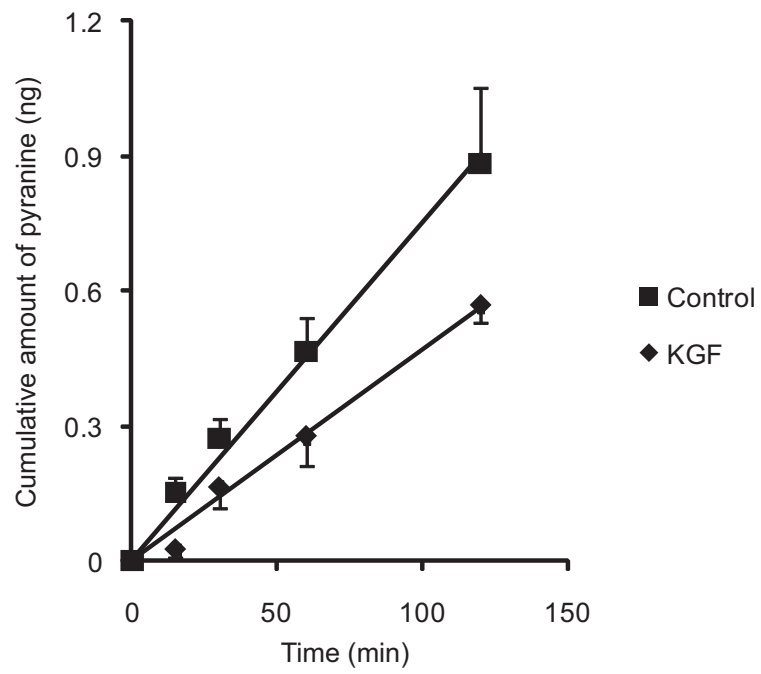

Supplemental Figure 1

Supplement: supp_00233.2010_figS1.pdf [file supp_00233.2010_figS1.pdf]
